# Supplementary material for: Lighting up endogenous H2O2 in the tumor microenvironment using a dual-mode nanoprobe for long afterglow and MR bioimaging
Source: Royal Society of Chemistry journal article supplement (doi:10.1039/d4an00576g), 2024-01-01
Supplement: d4an00576g1.pdf [file d4an00576g1.pdf]

## Electronic Supplementary Information (ESI)

*for*

### **Lighting up endogenous H<sub>2</sub>O<sub>2</sub> in tumor microenvironment using dual-mode nanoprobe by long afterglow and MR bioimaging**

Yiming Wang<sup>a</sup>, Jintao He<sup>a</sup>, Rong Feng<sup>a</sup>, Jingwen Chen<sup>a</sup>, Gege Xie<sup>a</sup>, Shengrong Yu<sup>\*ab</sup>,  
Yong-Xiang Wu<sup>\*ab</sup>, and Keqi Tang<sup>\*ab</sup>

<sup>a</sup>. Institute of Mass Spectrometry, Zhejiang Engineering Research Center of Advanced Mass spectrometry and Clinical Application, School of Material Science and Chemical Engineering, Ningbo University, Ningbo 315211, China.

<sup>b</sup>. Zhenhai Institute of Mass Spectrometry, Ningbo 315211, China.

\* To whom correspondence should be addressed.

E-mail: yushengrong@nbu.edu.cn

wuyongxiang@nbu.edu.cn

tangkeqi@nbu.edu.cn

## Table of contents

|                                                 |             |
|-------------------------------------------------|-------------|
| <b>1. Reagents and Materials .....</b>          | <b>S-3</b>  |
| <b>2. Apparatus .....</b>                       | <b>S-3</b>  |
| <b>3. Specificity Investigations .....</b>      | <b>S-3</b>  |
| <b>4. Supplementary Figures and Tables.....</b> | <b>S-4</b>  |
| <b>5. References.....</b>                       | <b>S-12</b> |

## 1. Reagents and Materials

Gallium oxide ( $\text{Ga}_2\text{O}_3$ ), chromic nitrate nonahydrate ( $\text{Cr}(\text{NO}_3)_3 \cdot 9\text{H}_2\text{O}$ ), zinc nitrate hexahydrate ( $\text{Zn}(\text{NO}_3)_2 \cdot 6\text{H}_2\text{O}$ ), potassium permanganate ( $\text{KMnO}_4$ ) was purchased from Aladdin (Shanghai, China). 2-Morpholinoethanesulphonic acid (MES) was purchased from Shanghai Sangon Biological Engineering Technology & Services (Shanghai, China).  $\text{H}_2\text{O}_2$  stimulant Phorbol 12-myristate 13-acetate (PMA) and  $\text{H}_2\text{O}_2$  scavenger N-acetyl-L-cysteine (NAC) were purchased from Beyotime Biotechnology (Shanghai, China). All other reagents were of analytical grade (Aladdin, Shanghai China) and used without further purification.

## 2. Apparatus

High-resolution transmission electron microscope (HRTEM, JEM-2100F, 200kV) was employed for the morphological characterization of the nanomaterials. RF-6000 fluorescence spectrophotometer (Shimadzu, Japan) was obtained for fluorescence spectrograms. The fluorescence microscopy images of cell were recorded by a Confocal Fluorescence Microscope (Olympus Fluoview FV3000, Japan). The measuring of longitudinal relaxation time ( $T_1$ ) was obtained by Bruke PharmaScan70/16US analyzing and imaging system (Institute of Basic Medicine and Cancer, Chinese Academy of Sciences, Hangzhou, China).

## 3. Specificity Investigations

Mix ZGC with different solutions of various that ions including the common metal cations ( $\text{K}^+$ ,  $\text{Na}^+$ ,  $\text{Mg}^{2+}$ ,  $\text{Mn}^{2+}$ ,  $\text{Zn}^{2+}$ ,  $\text{Fe}^{3+}$ ), common anions ( $\text{Cl}^-$ ,  $\text{NO}_3^-$ ,  $\text{SO}_4^{2-}$ ,  $\text{HCO}_3^-$ ), Glu and  $\text{H}_2\text{O}_2$ . The mixture was maintained at 25 °C for 30 min to facilitate the reaction. Fluorescence emission spectra ranging from 650 nm to 730 nm were obtained using an excitation wavelength of 488 nm. All fluorescence measurements were conducted in triplicate.

#### 4. Supplementary Figures and Tables

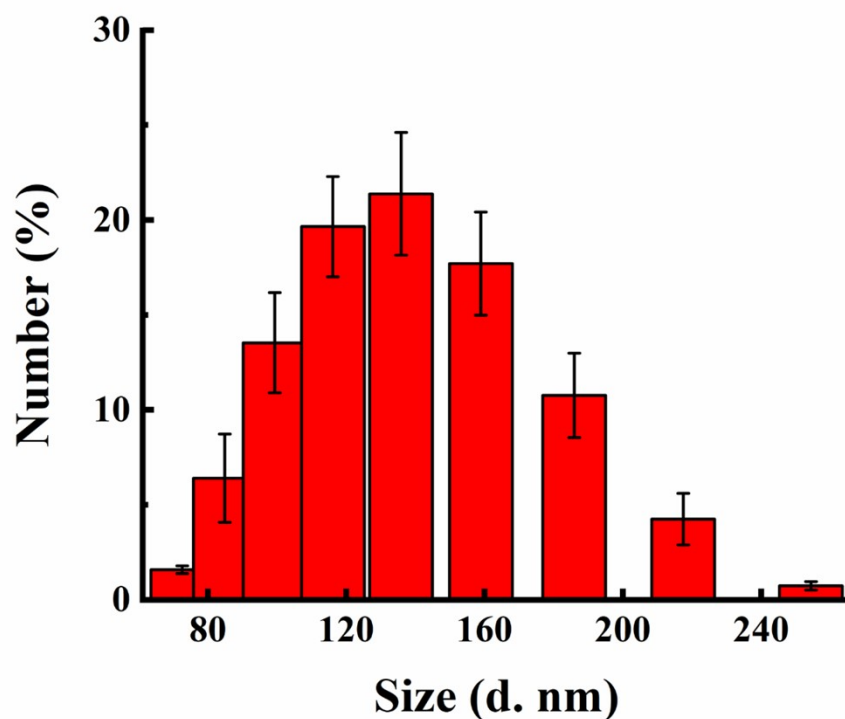

**Figure S1.** The particle size distribution of ZGC was determined based on dynamic light scattering.

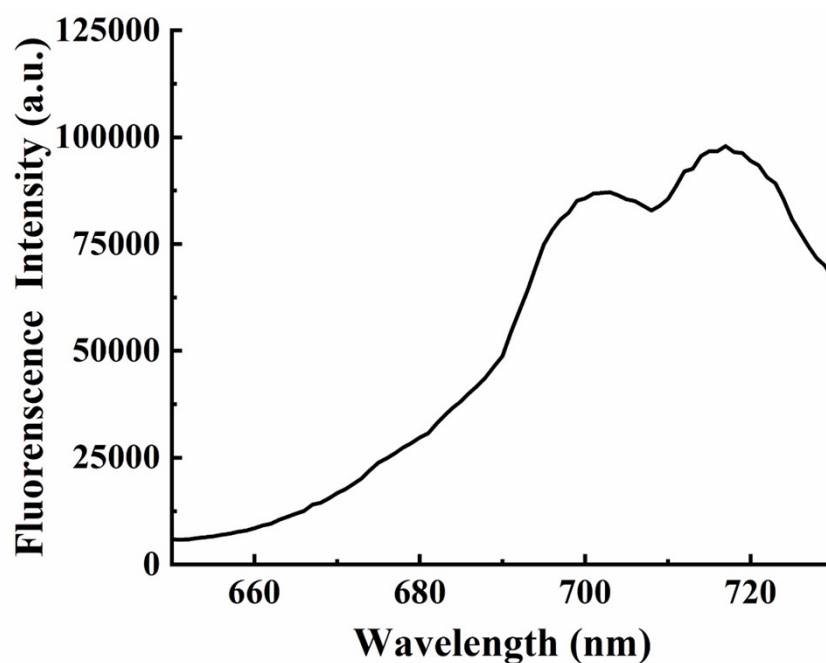

**Figure S2.** The luminescence spectrum of ZGC nanoparticles (290.0  $\mu\text{g/mL}$ ) in deionized  $\text{H}_2\text{O}$ .

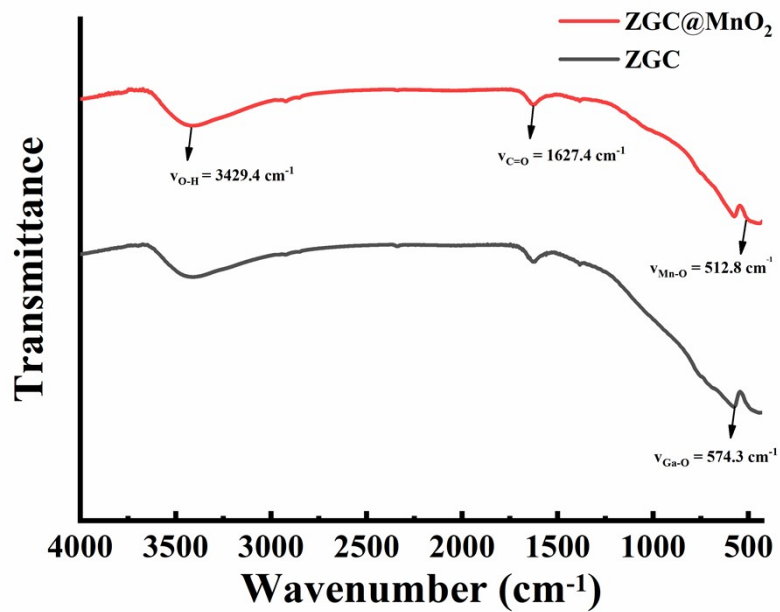

**Figure S3.** Fourier transform infrared spectrometer (FT-IR) spectrogram of ZGC and ZGC@MnO<sub>2</sub>.

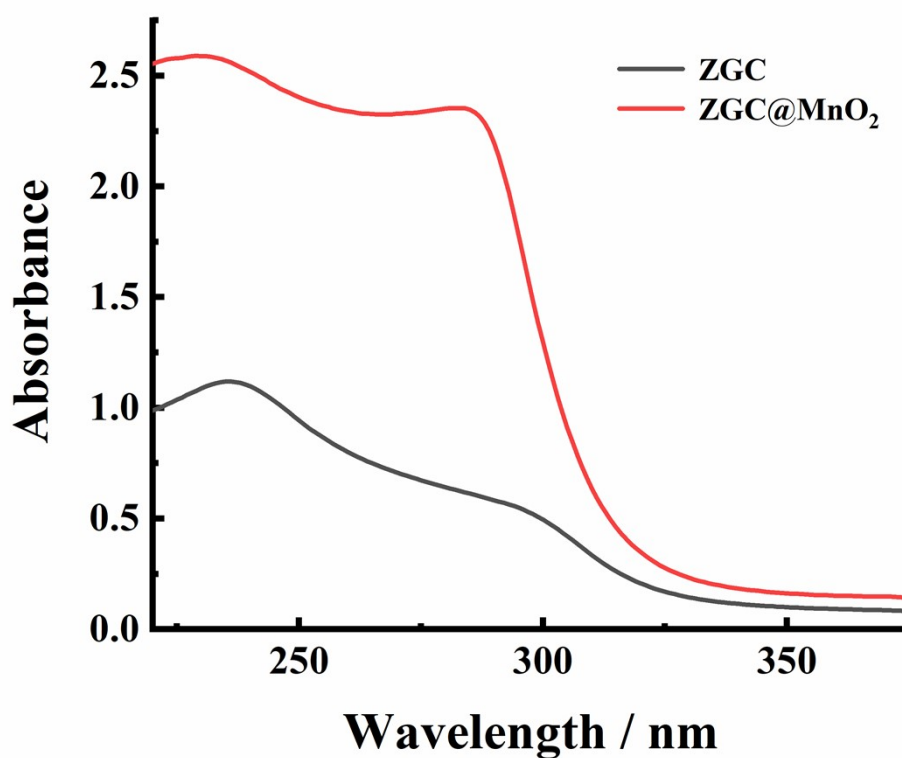

**Figure S4.** UV-vis absorption spectra of ZGC and ZGC@MnO<sub>2</sub> (290.0 μg/mL) in PBS (pH = 5.0, 100 mM).

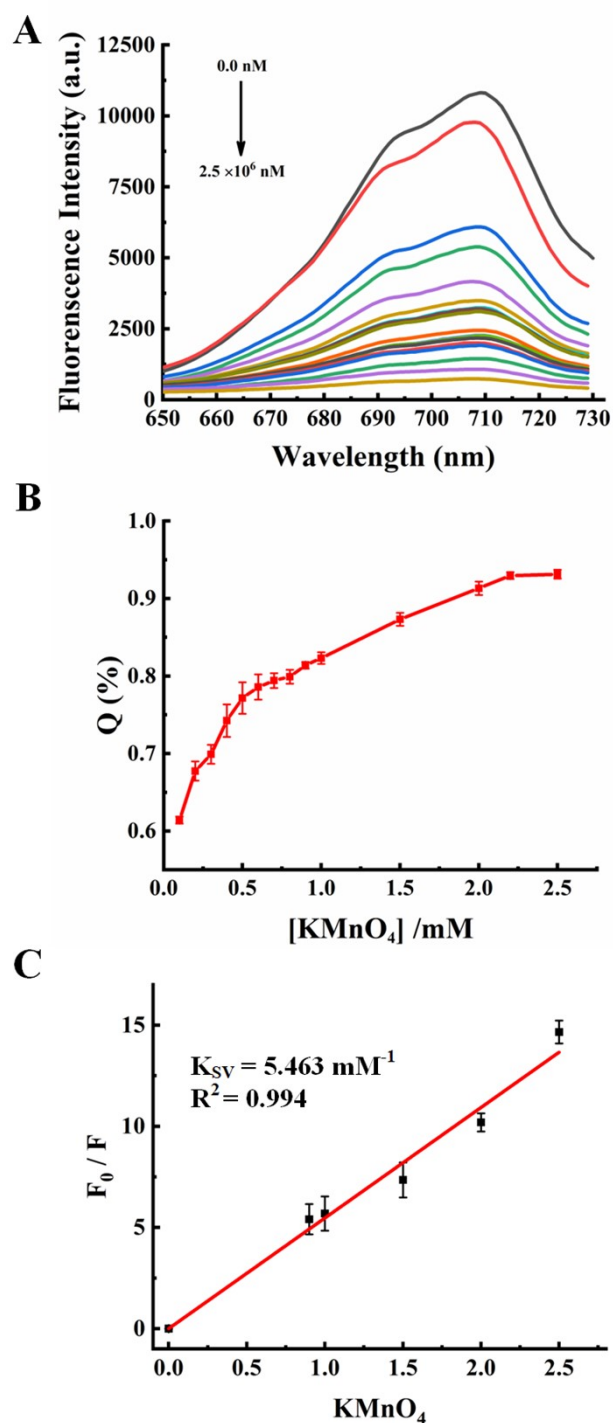

**Figure S5.** (A) Fluorescence quenching experiment of ZGC (75  $\mu\text{g/mL}$ ) under different concentrations of KMnO<sub>4</sub> (0 nM; 1 nM; 10 nM; 20 nM; 25 nM; 0.1 mM; 0.2 mM; 0.3 mM; 0.4 mM; 0.5 mM; 0.6 mM; 0.7 mM; 0.8 mM; 0.9 mM; 1.0 mM; 1.5 mM; 2.0 mM; 2.5 mM). (B) Fluorescence quenching rate (Q) versus different concentrations of KMnO<sub>4</sub>. (C) Stern–Volmer quenching graph of KMnO<sub>4</sub> in the existence of ZGC. The range of quenching efficiency of MnO<sub>2</sub> nanosheets was

evaluated via the Stern-Volmer equation:  $\frac{F_0}{F} = 1 + K_{sv}[Q]$ .

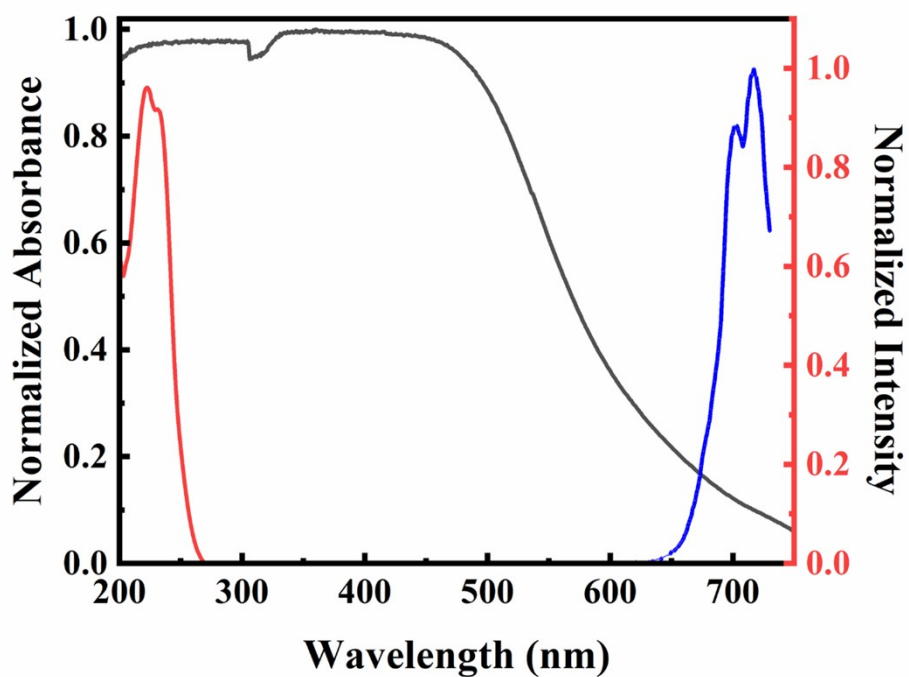

**Figure S6.** The UV-vis absorption spectrogram of MnO<sub>2</sub> nanosheets (grey line), the fluorescence spectrogram of prepared ZGC: the excitation (red line) and emission (blue line).

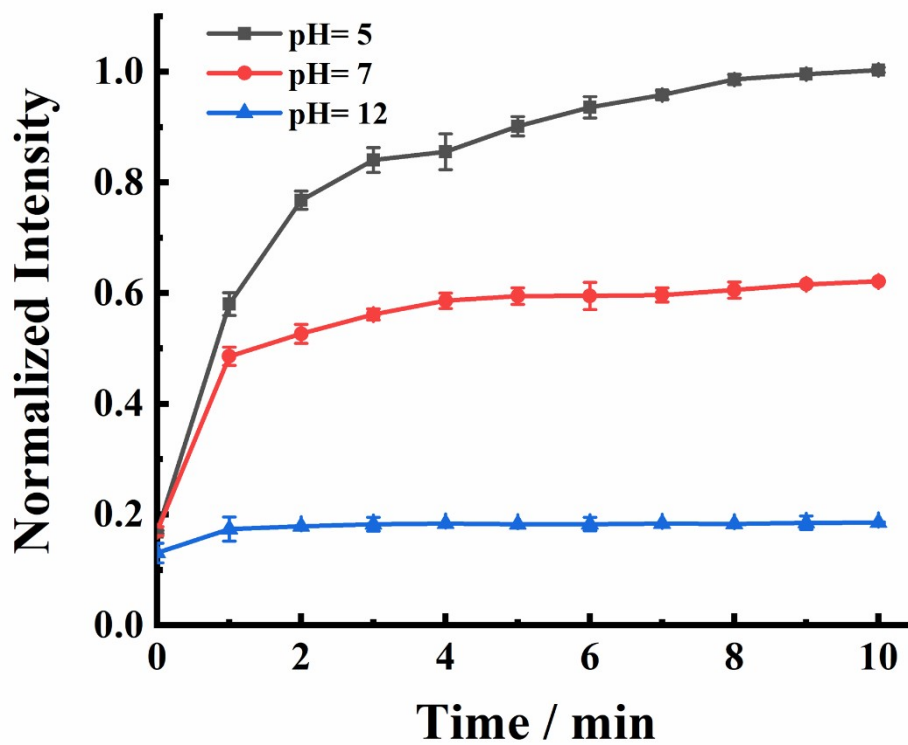

**Figure S7.** Fluorescence recovery time curve of ZGC@MnO<sub>2</sub> (290.0 μg/mL) under different pH values (5.0, 7.0 and 12.0) with H<sub>2</sub>O<sub>2</sub>.

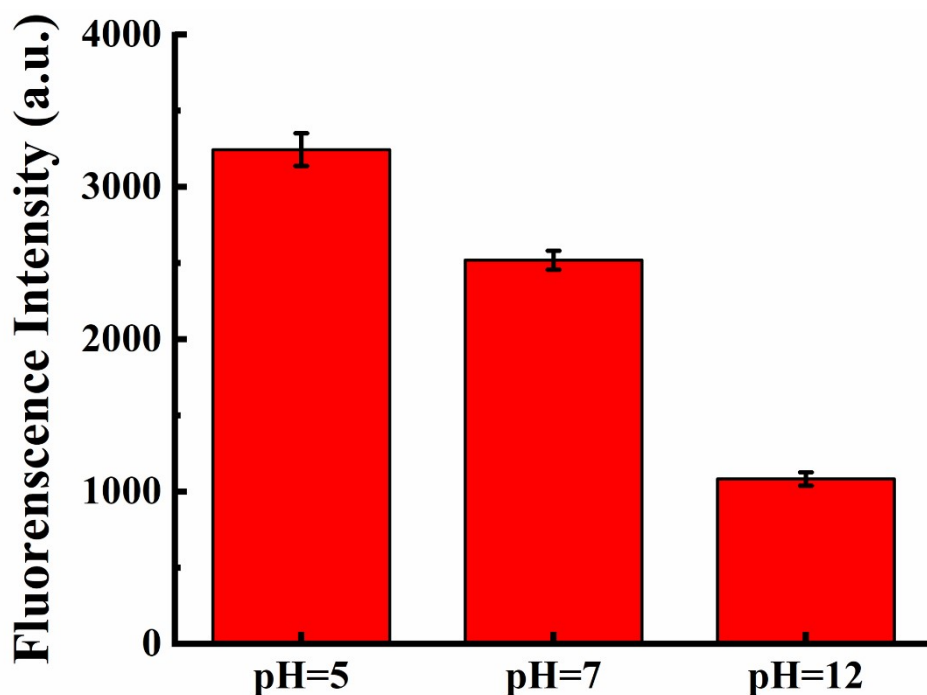

**Figure S8.** The PBS buffer solutions (pH = 5.0, 100 mM) with 1.0 mM H<sub>2</sub>O<sub>2</sub> under different pH values was prepared from Yongjiang River to explore the stability of ZGC@MnO<sub>2</sub> (290.0 μg/mL) in complex environments.

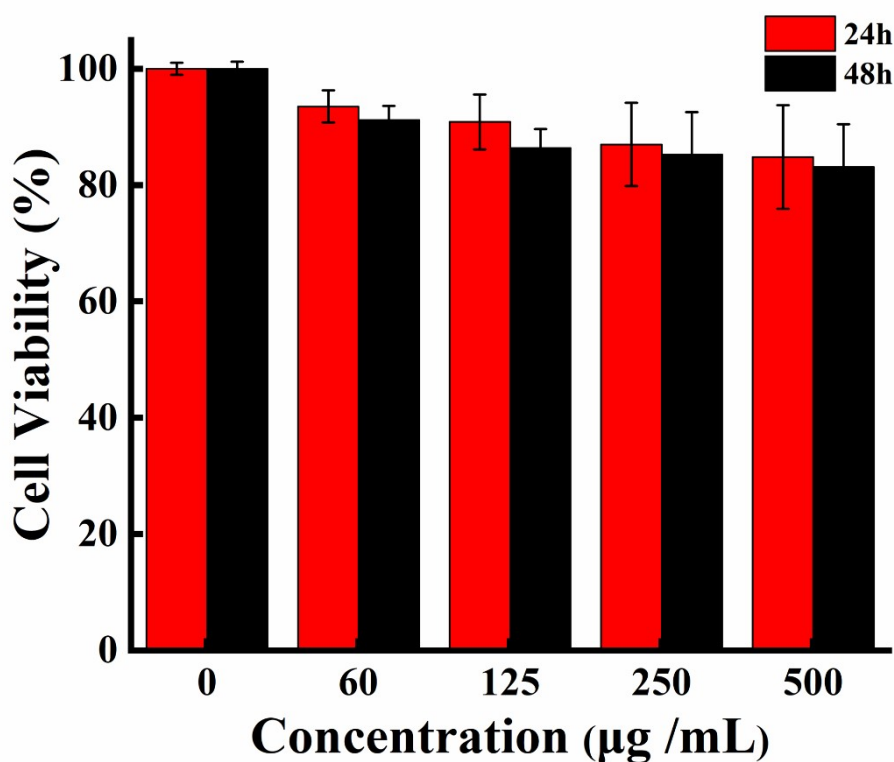

**Figure S9.** Cell viability of MCF-7 cells after being incubated with different concentrations of ZGC@MnO<sub>2</sub> for 24 h and 48 h.



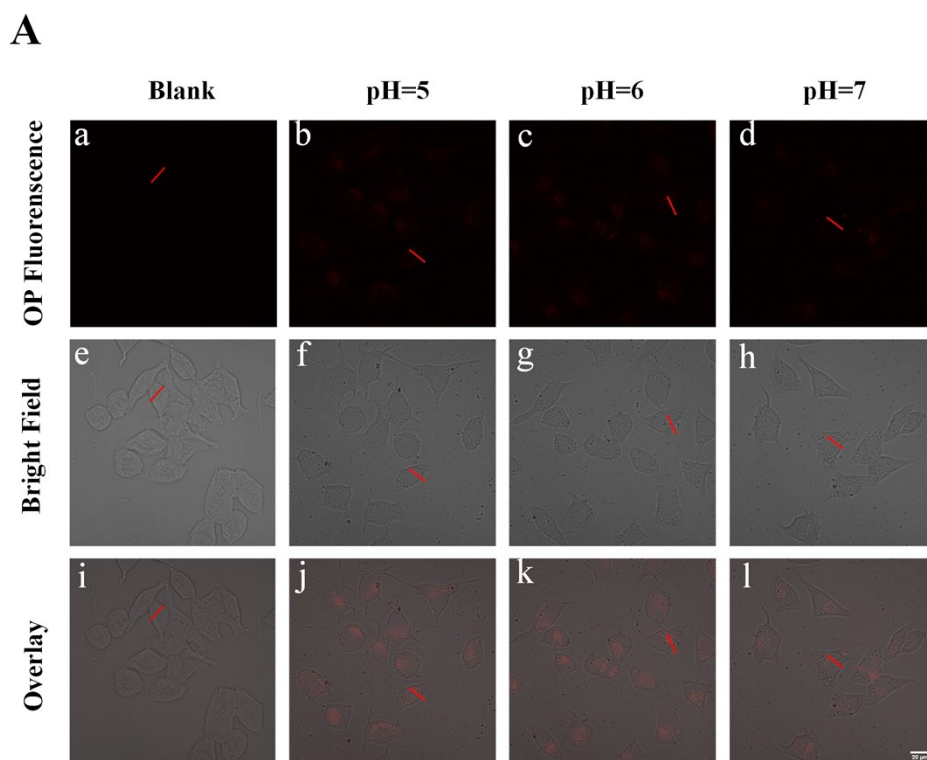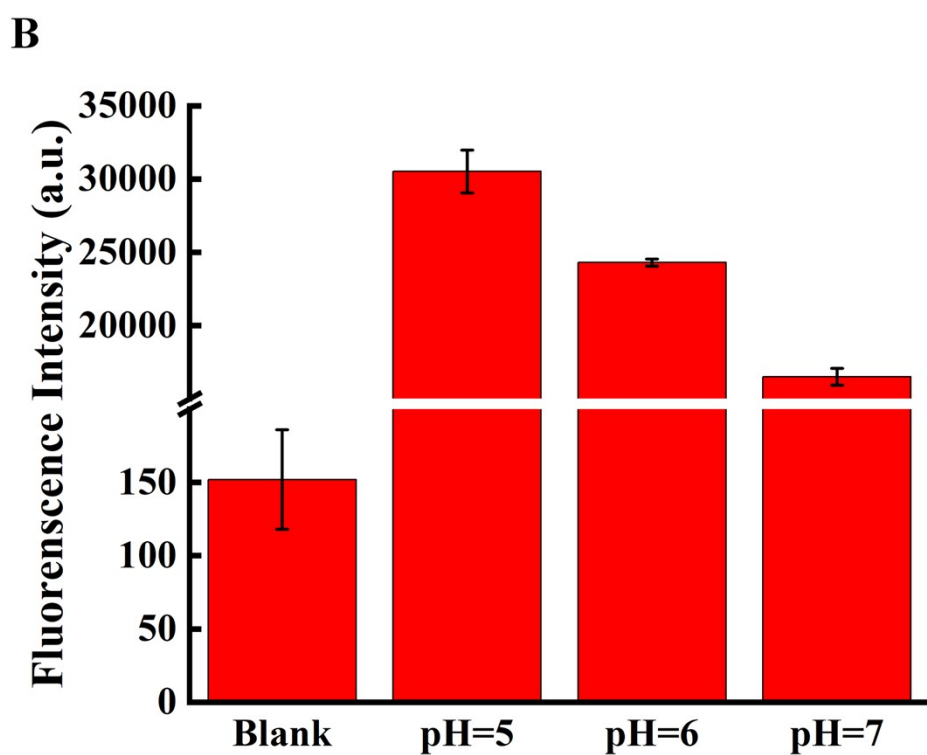

**Figure S10.** (A) The fluorescence response images of ZGC@MnO<sub>2</sub> (290.0 μg/mL) in cells under different pH conditions (pH=5, 6, 7). The scale bar is 20.0 μm. (B) The fluorescence intensity in cells of (A).

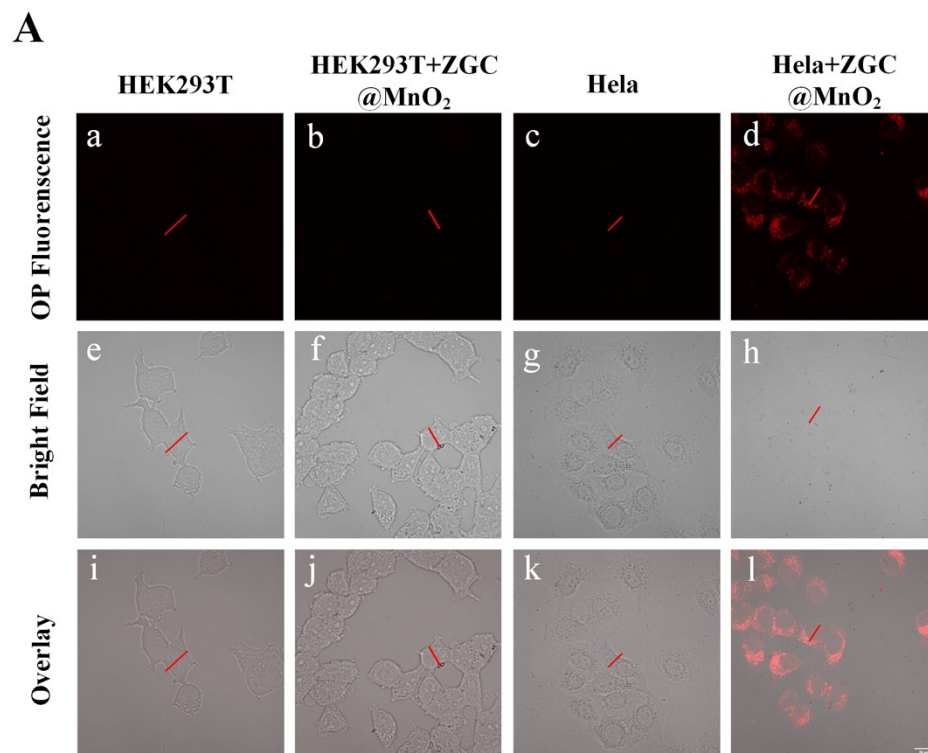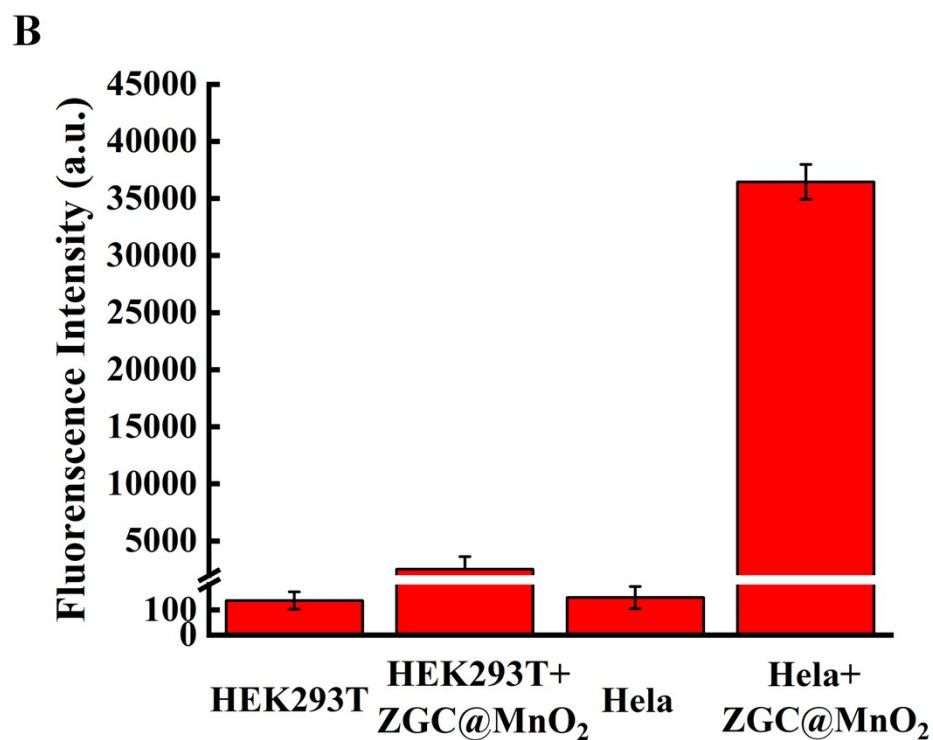

**Figure S11.** (A) The fluorescence images of ZGC@MnO<sub>2</sub> (HEPES, pH=5.0, 290.0  $\mu\text{g}/\text{mL}$ ) in normal cells (HEK293T, HEK293T+ZGC@MnO<sub>2</sub>) and cancer cells (Hela, Hela+ZGC@MnO<sub>2</sub>). The scale bar is 20.0  $\mu\text{m}$ . (B) The fluorescence intensity in cells of (A).

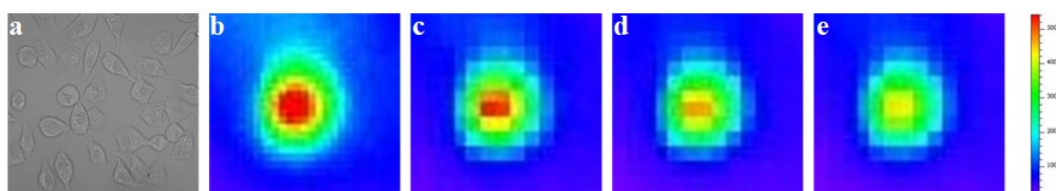

**Figure S12.** The ZGC@MnO<sub>2</sub> nanoprobe (290.0 μg/mL) in cells was irradiated with UV for 10 min followed by long afterglow imaging within 0-30min in IVIS (a: MCF-7 cells, b: 0.0 min, c: 10 min, d: 20 min, e: 30 min).

**Table S1. Comparison of ZGC@MnO<sub>2</sub> with other nanoprobe**

| Nanoprobe                          | Advantages of the ZGC@MnO <sub>2</sub> compared with this nanoprobe                                                                                                                                                                                                                                                                                                                            | Reference |
|------------------------------------|------------------------------------------------------------------------------------------------------------------------------------------------------------------------------------------------------------------------------------------------------------------------------------------------------------------------------------------------------------------------------------------------|-----------|
| AuPd-PDA                           | AuPd-PDA nanotube-modified electrodes in the detection of H <sub>2</sub> O <sub>2</sub> . However, this probe relies on real-time electrochemical signals and cannot provide continuous signal output like long-persistence probes. Additionally, the preparation process involves the use of precious metals, which increases the production cost.                                            | [1]       |
| FeN <sub>3</sub> /PtN <sub>4</sub> | FeN <sub>3</sub> /PtN <sub>4</sub> single atom nanozymes exhibit high sensitivity and rapid response in H <sub>2</sub> O <sub>2</sub> detection. However, their complex preparation, susceptibility to interference from bioactive substances, and short signal duration compared to persistent luminescence probes limit their stability.                                                     | [2]       |
| Si-CdTe QDs                        | Si-CdTe QDs probes exhibit high sensitivity and selectivity in H <sub>2</sub> O <sub>2</sub> detection. However, ZGC@MnO <sub>2</sub> offers better detection accuracy and achieves detection through dual-mode imaging. Additionally, its luminescence signal in the near-infrared region is more suitable for deep-tissue imaging.                                                           | [3]       |
| MTCN                               | Although MTCN achieves dual-mode H <sub>2</sub> O <sub>2</sub> detection through fluorescence and photoacoustic imaging, ZGC@MnO <sub>2</sub> offers simpler preparation and it provides continuous signal output like long-persistence probes. The luminescence signal of ZGC@MnO <sub>2</sub> in the near-infrared region can reduce the interference of background signals in the organism. | [4]       |
| TP-CQDs@MnO <sub>2</sub>           | Although this probe leverages two-photon advantages for deep tissue detection, ZGC@MnO <sub>2</sub> does not require <i>in-situ</i>                                                                                                                                                                                                                                                            | [5]       |

|  |                                                                                                                                                                                                                                                    |  |
|--|----------------------------------------------------------------------------------------------------------------------------------------------------------------------------------------------------------------------------------------------------|--|
|  | excitation, and the luminescence signal of ZGC@MnO <sub>2</sub> in the near-infrared region can reduce the interference of background signals in the organism, making it more suitable for <i>in vivo</i> H <sub>2</sub> O <sub>2</sub> detection. |  |
|--|----------------------------------------------------------------------------------------------------------------------------------------------------------------------------------------------------------------------------------------------------|--|

**Table S2. Performance Comparison Between Developed Methods and Reported Methods**

| Method                            | Signal model                   | Resistance to background interference | Limit of detection (LOD) | Reference |
|-----------------------------------|--------------------------------|---------------------------------------|--------------------------|-----------|
| AgNWs                             | Electrochemical                | Medium                                | 46 $\mu$ M               | [6]       |
| CuCo <sub>2</sub> S <sub>4</sub>  | Electrochemical                | Low                                   | 0.084 mM                 | [7]       |
| CD-NP-BE                          | Fluorescent (FRET-based)       | High                                  | 0.5 $\mu$ M              | [8]       |
| AuNPs/PEG                         | Electrochemical                | High                                  | 170 nM                   | [9]       |
| TMN-H <sub>2</sub> O <sub>2</sub> | Fluorescent (NIR-based)        | High                                  | 76 nM                    | [10]      |
| ZGC@MnO <sub>2</sub>              | Persistent luminescence and MR | High                                  | 3.67 nM                  | This work |

## 5. References

1. G. L. He, F. L. Gao, W. Li, P. W. Li, X. F. Zhang, H. Yin, B. C. Yang, Y. B. Liu and S. R. Zhang, *Analytical Methods*, 2019, **11**, 1651-1656.
2. S. Wang, Z. F. Hu, Q. L. Wei, H. M. Zhang, W. N. Tang, Y. Q. Sun, H. Q. Duan, Z. C. Dai, Q. Y. Liu and X. W. Zheng, *Nano Research*, 2022, **15**, 4266-4273.
3. J. L. Zhou, R. X. Zhao, Y. Q. Du, S. K. Liu, W. T. Li, S. L. Gai, F. He, L. L. Feng and P. P. Yang, *Advanced Functional Materials*, 2022, **32**, 2112083.
4. T. Chen, Z. L. Chen, Q. T. Zhou, H. Y. Ding, P. Gong, J. Wang, H. L. Cai, R. J. Ao, M. L. Yu, J. B. Song, L. S. Lin and H. H. Yang, *Advanced Functional Materials*, 2022, **32**, 2208720.
5. H. Zhong, S. Yu, B. Li, K. He, D. Li, X. Wang and Y.-X. Wu, *Chemical Communications*, 2021, **57**, 6288-6291.

6. J. H. Lee, B.-C. Huynh-Nguyen, E. Ko, J. H. Kim and G. H. Seong, *Sensors and Actuators B: Chemical*, 2016, **224**, 789-797.
7. Z. Yang, S. Zhang, Y. Fu, X. Zheng and J. Zheng, *Electrochimica Acta*, 2017, **255**, 23-30.
8. G. Wu, F. Zeng, C. Yu, S. Wu and W. Li, *J Mater Chem B*, 2014, **2**, 8528-8537.
9. Z. Zhao and M. Zharnikov, *Nanomaterials (Basel)*, 2023, **13**, 3137.
10. G. Chunpo, Y. Yan, T. Pengfei, S. Hu, J. Yibo, S. Yuyang, Y. Yun and R. Feng, *Sensors and Actuators B: Chemical*, 2022, **350**, 130831.
